# Supplementary material
Source: PubMed Central journal article supplement (PMC5539841)
Supplement: jamapsychiatry-74-589-s001.pdf [file jamapsychiatry-74-589-s001.pdf]

## Supplementary Online Content

Quinn PD, Rickert ME, Weibull CE, et al. Association between maternal smoking during pregnancy and severe mental illness in offspring. *JAMA Psychiatry*. Published online May 3, 2017. doi:10.1001/jamapsychiatry.2017.0456

**eTable 1.** *International Classification of Diseases (ICD) Codes*

**eTable 2.** Discordant Cousin and Sibling Samples

**eTable 3.** Sensitivity Analyses: First-Born Cousins, Additional Outcomes, and Missing Data

**eTable 4.** Sensitivity Analyses: Population Associations

**eFigure.** Kaplan-Meier Plots for Bipolar Disorder, Schizophrenia Spectrum Disorders, Severe Mental Illness and Substance Use Disorder, and Any Substance Use Disorder

This supplementary material has been provided by the authors to give readers additional information about their work.

**eTable 1. International Classification of Diseases (ICD) Codes**

| <b>Disorder</b>                  | <b>ICD-10</b>                 | <b>ICD-9</b>                                    | <b>ICD-8</b>        |
|----------------------------------|-------------------------------|-------------------------------------------------|---------------------|
| Bipolar disorder                 | F30-F31                       | 296A, 296C-296E, 296W                           | 296.1, 296.3, 296.8 |
| Schizophrenia spectrum disorders | F20-F29                       | 295, 297, 298                                   | 295, 297, 298, 299  |
| Substance use disorder           | F10-F19, except F17 (tobacco) | 291, 292, 303, 304, 305, except 305.1 (tobacco) | 291, 303, 304       |

**eTable 2. Discordant Cousin and Sibling Samples**

| Outcome                          | Cousins           |              | Siblings |                     |
|----------------------------------|-------------------|--------------|----------|---------------------|
|                                  | Extended Families | Cousin Pairs | Families | Individual Siblings |
| Any severe mental illness (SMI)  | 1799              | 3140         | 1501     | 3615                |
| Bipolar disorder                 | 1171              | 1998         | 990      | 2381                |
| Schizophrenia spectrum disorders | 786               | 1393         | 630      | 1513                |
| SMI and substance use disorder   | 795               | 1456         | 676      | 1679                |

Cousin pairs and siblings discordant on severe mental illness and exposure to maternal smoking during pregnancy.

**eTable 3. Sensitivity Analyses: First-Born Cousins, Additional Outcomes, and Missing Data**

| Sensitivity Analysis                           | Included n | 1. Population<br>HR/OR (95% CI) | 2. Adjusted<br>HR/OR (95% CI) | 3. Cousin<br>HR/OR (95% CI) | 4. Sibling<br>HR/OR (95% CI) |
|------------------------------------------------|------------|---------------------------------|-------------------------------|-----------------------------|------------------------------|
| <b>First-born cousins</b>                      | 638 056    |                                 |                               |                             |                              |
| Moderate SDP                                   |            | 1.33 (1.25-1.42)                | 1.17 (1.09-1.25)              | 1.11 (0.87-1.40)            | --                           |
| High SDP                                       |            | 1.66 (1.54-1.79)                | 1.35 (1.25-1.47)              | 1.16 (0.85-1.58)            | --                           |
| <b>Additional Outcomes</b>                     |            |                                 |                               |                             |                              |
| <b>Any substance use disorder</b>              | 1 680 219  |                                 |                               |                             |                              |
| Moderate SDP                                   |            | 1.69 (1.66-1.73)                | 1.36 (1.33-1.39)              | 1.19 (1.15-1.24)            | 1.03 (0.97-1.09)             |
| High SDP                                       |            | 2.08 (2.03-2.12)                | 1.50 (1.46-1.53)              | 1.29 (1.24-1.35)            | 1.01 (0.94-1.09)             |
| <b>Small for gestational age<sup>a,b</sup></b> | 1 680 219  |                                 |                               |                             |                              |
| Moderate SDP                                   |            | 2.10 (2.05-2.16)                | 2.04 (1.98-2.09)              | 2.11 (1.89-2.34)            | 1.63 (1.50-1.77)             |
| High SDP                                       |            | 2.78 (2.70-2.86)                | 2.58 (2.51-2.66)              | 2.62 (2.29-3.00)            | 1.83 (1.66-2.02)             |
| <b>Preterm birth<sup>a,c</sup></b>             | 1 679 346  |                                 |                               |                             |                              |
| Moderate SDP                                   |            | 1.25 (1.23-1.28)                | 1.17 (1.14-1.19)              | 1.16 (1.07-1.26)            | 1.13 (1.06-1.20)             |
| High SDP                                       |            | 1.50 (1.47-1.54)                | 1.36 (1.32-1.39)              | 1.29 (1.17-1.42)            | 1.22 (1.13-1.32)             |
| <b>Missing Data</b>                            |            |                                 |                               |                             |                              |
| <b>Missing assumed high SDP</b>                | 1 789 475  |                                 |                               |                             |                              |
| Moderate SDP                                   |            | 1.25 (1.19-1.30)                | 1.12 (1.07-1.17)              | 1.11 (1.02-1.21)            | 1.03 (0.91-1.17)             |
| High SDP                                       |            | 1.38 (1.33-1.44)                | 1.19 (1.14-1.24)              | 1.22 (1.13-1.33)            | 1.05 (0.94-1.18)             |
| <b>Missing assumed no SDP</b>                  | 1 789 475  |                                 |                               |                             |                              |
| Moderate SDP                                   |            | 1.23 (1.17-1.28)                | 1.11 (1.06-1.16)              | 1.08 (1.00-1.18)            | 1.04 (0.92-1.18)             |
| High SDP                                       |            | 1.49 (1.42-1.56)                | 1.25 (1.19-1.31)              | 1.20 (1.09-1.33)            | 1.09 (0.94-1.26)             |

“Assumed high SDP” indicates that all missing SDP values were set to high SDP (i.e., the worst case). “Assumed no SDP” indicates all missing values set to no SDP (i.e., the best case). Unless otherwise noted, outcome is any severe mental illness, and estimates are hazard ratios (HRs). CI = confidence interval. SDP = maternal smoking during pregnancy.

<sup>a</sup> Estimates are odds ratios (ORs).

<sup>b</sup> 41 614 cases (2.48%).

<sup>c</sup> 80 712 cases (4.81%).

**eTable 4. Sensitivity Analyses: Population Associations**

| <b>Population</b>  | <b>Included n</b> | <b>Moderate SDP<br/>HR (95% CI)</b> | <b>High SDP<br/>HR (95% CI)</b> |
|--------------------|-------------------|-------------------------------------|---------------------------------|
| <b>Family size</b> |                   |                                     |                                 |
| Single offspring   | 434 920           | 1.17 (1.09-1.27)                    | 1.42 (1.30-1.54)                |
| Multiple offspring | 1 245 299         | 1.27 (1.20-1.34)                    | 1.53 (1.45-1.63)                |
| <b>Birth year</b>  |                   |                                     |                                 |
| 1983-1991          | 825 671           | 1.23 (1.18-1.29)                    | 1.50 (1.43-1.59)                |
| 1992-2001          | 854 548           | 1.50 (1.36-1.66)                    | 1.82 (1.63-2.05)                |

Associations are between maternal smoking during pregnancy (SDP) and any offspring severe mental illness. HR = hazard ratio. CI = confidence interval.

**eFigure. Kaplan-Meier Plots for Bipolar Disorder, Schizophrenia Spectrum Disorders, Severe Mental Illness and Substance Use Disorder, and Any Substance Use Disorder**

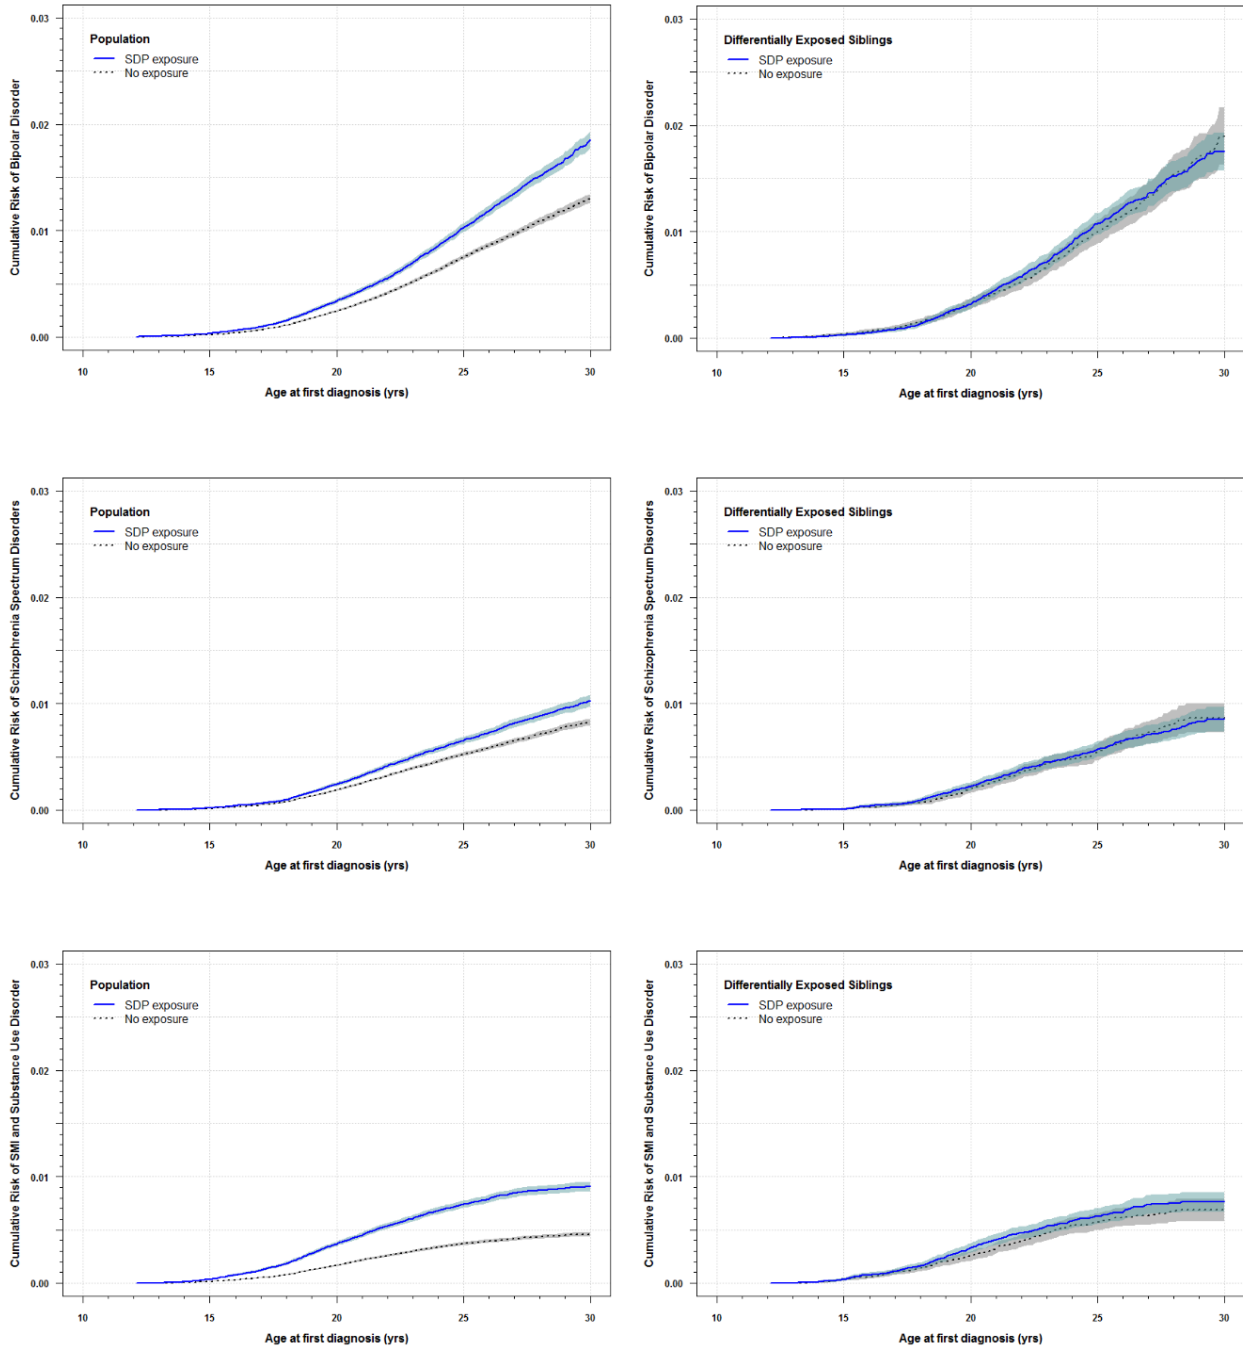

## eFigure (continued)

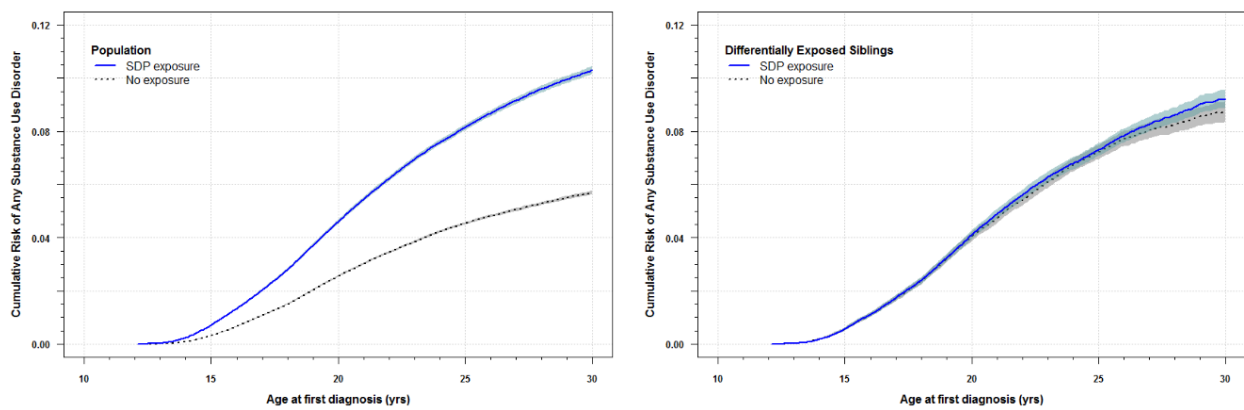

Kaplan-Meier estimates of cumulative risk (i.e., proportion diagnosed) by age among those with and without any smoking during pregnancy (SDP) exposure. Left panels include full cohort; right panels include siblings discordant for SDP exposure only. Shaded areas are pointwise 95% confidence intervals. SMI = severe mental illness.
